# Supplementary material for: Dietary intakes of flavonoids in relation to cognitive function among middle-aged and older adults: results from the Chinese Square Dance Cohort
Source: Royal Society of Chemistry journal article supplement (doi:10.1039/d4fo03991b), 2025-01-01
Supplement: d4fo03991b1.pdf [file d4fo03991b1.pdf]

Supplementary Table 1. Constructed database for the flavonoids content in each food item.

| Food items               | Anthocyanidins<br>(mg/100g) | Flavan-3-ols<br>(mg/100g) | Flavanones<br>(mg/100g) | Flavones<br>(mg/100g) | Flavonols<br>(mg/100g) | Procyanidins<br>(mg/100g) | Isoflavones<br>(mg/100g) |
|--------------------------|-----------------------------|---------------------------|-------------------------|-----------------------|------------------------|---------------------------|--------------------------|
| <b>Staple Food</b>       |                             |                           |                         |                       |                        |                           |                          |
| Coarse cereals           | 23.65                       | 0.00                      | 0.00                    | 2.68                  | 5.30                   | 0.00                      | 0.00                     |
| Sweet potato             | 0.00                        | 0.00                      | 0.00                    | 0.00                  | 0.00                   | 0.00                      | 0.02                     |
| <b>Legume</b>            |                             |                           |                         |                       |                        |                           |                          |
| Soybeans                 | 29.40                       | 0.00                      | 0.00                    | 13.61                 | 9.68                   | 0.00                      | 20.34                    |
| Mixed beans              | 16.47                       | 0.00                      | 0.00                    | 8.07                  | 12.80                  | 0.00                      | 0.07                     |
| Other soy products       | 0.00                        | 0.00                      | 0.00                    | 0.95                  | 0.56                   | 0.00                      | 4.34                     |
| <b>Vegetables</b>        |                             |                           |                         |                       |                        |                           |                          |
| Legume vegetables        | 5.00                        | 0.00                      | 0.00                    | 3.18                  | 5.45                   | 0.00                      | 0.12                     |
| Leaf vegetables          | 0.00                        | 0.00                      | 0.00                    | 0.64                  | 12.25                  | 0.00                      | 0.01                     |
| Root and stem vegetables | 0.00                        | 0.00                      | 0.00                    | 0.05                  | 1.71                   | 0.00                      | 0.01                     |
| Solanaceous vegetables   | 4.87                        | 0.00                      | 0.00                    | 1.60                  | 11.47                  | 0.00                      | 0.05                     |
| Melon vegetables         | 0.00                        | 0.00                      | 0.00                    | 0.53                  | 6.31                   | 0.00                      | 0.00                     |
| Stem vegetables          | 0.00                        | 0.00                      | 0.00                    | 19.63                 | 0.92                   | 0.00                      | 0.00                     |
| Cabbages                 | 26.86                       | 0.00                      | 0.66                    | 0.68                  | 5.71                   | 0.00                      | 0.01                     |
| Allium                   | 0.00                        | 0.00                      | 0.00                    | 0.01                  | 5.20                   | 0.00                      | 0.01                     |
| Mushrooms                | 0.00                        | 0.00                      | 0.00                    | 0.24                  | 2.34                   | 0.00                      | 0.11                     |
| Edible fungi             | 0.00                        | 0.00                      | 0.00                    | 1.89                  | 3.01                   | 0.00                      | 0.04                     |
| <b>Fruits</b>            |                             |                           |                         |                       |                        |                           |                          |
| Citrus                   | 0.00                        | 0.00                      | 25.66                   | 7.00                  | 17.86                  | 0.00                      | 0.00                     |
| Pome fruits              | 1.44                        | 7.09                      | 0.00                    | 0.64                  | 26.07                  | 43.24                     | 0.07                     |
| Stone fruits             | 5.92                        | 1.55                      | 0.00                    | 1.52                  | 24.34                  | 42.62                     | 0.00                     |
| Berries                  | 80.79                       | 4.44                      | 0.09                    | 0.43                  | 9.41                   | 72.60                     | 0.00                     |
| Tropical fruit           | 18.45                       | 0.24                      | 0.00                    | 3.52                  | 20.24                  | 1.38                      | 0.15                     |

|             |      |      |      |      |       |      |      |
|-------------|------|------|------|------|-------|------|------|
| Melons      | 4.91 | 0.00 | 0.00 | 1.13 | 11.35 | 0.00 | 0.00 |
| <b>Nuts</b> |      |      |      |      |       |      |      |
| Melon seeds | 0.00 | 0.00 | 0.00 | 0.00 | 0.00  | 0.00 | 0.32 |
| Peanut      | 1.00 | 0.00 | 0.00 | 0.00 | 0.00  | 0.00 | 0.61 |
| Other nuts  | 1.22 | 1.14 | 0.00 | 1.13 | 10.78 | 0.00 | 0.01 |

---

**Supplementary table 2. The information on neuropsychological tests in this study**

| <b>Cognitive domains</b> | <b>Tests</b> | <b>Details</b>                                                                                                                                                                                                                                                                                                               |
|--------------------------|--------------|------------------------------------------------------------------------------------------------------------------------------------------------------------------------------------------------------------------------------------------------------------------------------------------------------------------------------|
| <b>Memory</b>            | AVLT-H       | The word list is composed of 12 words, the participants were asked to immediately recall 12 words three times in learning trials, and then performed a short-term delayed recall (5-minute delay time) and a long-term delayed recall (20-minute delay time).                                                                |
| <b>Language</b>          | AFT          | The participants were required to name as many animals as possible within one minute.                                                                                                                                                                                                                                        |
| <b>Attention</b>         | DSST         | There were 9 numbers paired with symbols. The participants were asked to transform the number into the corresponding symbol in the boxes within 90 seconds. The score is the total number of correct matches.                                                                                                                |
| <b>Execution</b>         | TMT-B        | The Trail Making Test-B was amended, the sequential letters were replaced by white Arabic numerals which match the black Arabic numerals. The participants were asked to connect the number from small to large, with black and white alternation. The shorter time of completion indicated the better performance on TMT-B. |

AVLT-H, Auditory Verbal Learning Test-Huashan Version; AFT, Animal Verbal Fluency Test; DSST, Digital Symbol Substitution Test; TMT-B, Trail Making Test-B.
